# Supplementary material for: Novel Golden Lipid Nanoparticles with Small Interference Ribonucleic Acid for Substrate Reduction Therapy in Fabry Disease
Source: MDPI journal article supplement (doi:10.3390/pharmaceutics15071936), 2023-07-12
Supplement: s1 [file s1]

## Supplementary material

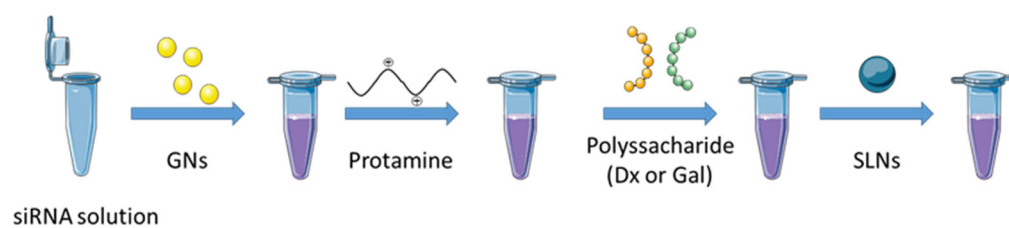

**Figure S1.** Preparation of siRNA-based vectors.

**Table S1.** Composition of siRNA-based vectors.

| Vector          | Type of SLN | Dx:P:siRNA<br>(w:w:w ratio) | Gal:P:siRNA<br>(w:w:w ratio) | Size of GN<br>(nm) |
|-----------------|-------------|-----------------------------|------------------------------|--------------------|
| DX-P2-GN5-HT    | HT          | 1:2:1                       |                              | 5                  |
| DX-P3-GN5-HT    | HT          | 1:3:1                       |                              | 5                  |
| Gal-P2-GN5-HT   | HT          |                             | 0.1:2:1                      | 5                  |
| Gal-P3-GN5-HT   | HT          |                             | 0.1:3:1                      | 5                  |
| DX-P2-GN5-HD    | HD          | 1:2:1                       |                              | 5                  |
| DX-P3-GN5-HD    | HD          | 1:3:1                       |                              | 5                  |
| Gal-P2-GN5-HD   | HD          |                             | 0.1:2:1                      | 5                  |
| Gal-P3-GN5-HD   | HD          |                             | 0.1:3:1                      | 5                  |
| DX-P3-ET        | ET          | 1:3:1                       |                              | -                  |
| DX-P2-GN5-ET    | ET          | 1:2:1                       |                              | 5                  |
| DX-P3-GN5-ET    | ET          | 1:3:1                       |                              | 5                  |
| DX-P2-GN1.8-ET  | ET          | 1:2:1                       |                              | 1.8                |
| DX-P3-GN1.8-ET  | ET          | 1:3:1                       | 0.1:3:1                      | 1.8                |
| 3Gal-P3-ET      | ET          |                             | 0.1:3:1                      | -                  |
| Gal-P2-GN5-ET   | ET          |                             | 0.1:2:1                      | 5                  |
| Gal-P3-GN5-ET   | ET          |                             | 0.1:3:1                      | 5                  |
| Gal-P2-GN1.8-ET | ET          |                             | 0.1:2:1                      | 1.8                |
| Gal-P3-GN1.8-ET | ET          |                             | 0.1:3:1                      | 1.8                |
| DX-P3-ED        | ED          | 1:3:1                       |                              | -                  |
| DX-P2-GN5-ED    | ED          | 1:2:1                       |                              | 5                  |
| DX-P3-GN5-ED    | ED          | 1:3:1                       |                              | 5                  |
| DX-P2-GN1.8-ED  | ED          | 1:2:1                       |                              | 1.8                |
| DX-P3-GN1.8-ED  | ED          | 1:3:1                       |                              | 1.8                |
| Gal-P3-ED       | ED          |                             | 0.1:3:1                      | -                  |
| Gal-P2-GN5-ED   | ED          |                             | 0.1:2:1                      | 5                  |
| Gal-P3-GN5-ED   | ED          |                             | 0.1:3:1                      | 5                  |
| Gal-P2-GN1.8-ED | ED          |                             | 0.1:2:1                      | 1.8                |

|                 |    |  |         |     |
|-----------------|----|--|---------|-----|
| Gal-P3-GN1.8-ED | ED |  | 0.1:3:1 | 1.8 |
|-----------------|----|--|---------|-----|

HT: HT-based vectors. HD: HD-based vectors. ET: ET-based vectors. ED: ED-based vectors. DX: dextran. Gal: galactomannan. P: protamine. GN5: gold nanoparticles of 5 nm diameter. GN1.8: gold nanoparticles of 1.8 nm diameter. PDI: polydispersity index. SLNs were added in a weight ratio of 5 referred to siRNA. GN of 5 nm were added in a volume of 5  $\mu$ L while 1  $\mu$ L of 1.8 nm GN were used. Data are expressed as mean  $\pm$  standard deviation;  $n=3$ .

**Table S2.** Physical characterization of SLNs-based vectors.

| SLN-based vector | Vector          | Size Z-average (d.nm) | PDI             | $\zeta$ -Potential (mV) |
|------------------|-----------------|-----------------------|-----------------|-------------------------|
| HT               | DX-P2-GN5-HT    | 173.3 $\pm$ 55.2      | 0.35 $\pm$ 0.08 | 38.8 $\pm$ 8.3          |
|                  | DX-P3-GN5-HT    | 237.2 $\pm$ 14.8      | 0.44 $\pm$ 0.05 | 30.9 $\pm$ 5.2          |
|                  | Gal-P2-GN5-HT   | 278.0 $\pm$ 85.0      | 0.40 $\pm$ 0.09 | 31.7 $\pm$ 10.5         |
|                  | Gal-P3-GN5-HT   | 314.3 $\pm$ 28.9      | 0.40 $\pm$ 0.08 | 30.0 $\pm$ 4.0          |
| HD               | DX-P2-GN5-HD    | 326.8 $\pm$ 8.1       | 0.39 $\pm$ 0.04 | 31.9 $\pm$ 8.8          |
|                  | DX-P3-GN5-HD    | 294.3 $\pm$ 12.8      | 0.39 $\pm$ 0.01 | 35.9 $\pm$ 6.3          |
|                  | Gal-P2-GN5-HD   | 273.0 $\pm$ 24.6      | 0.46 $\pm$ 0.06 | 31.7 $\pm$ 7.3          |
|                  | Gal-P3-GN5-HD   | 270.9 $\pm$ 9.9       | 0.37 $\pm$ 0.02 | 35.4 $\pm$ 8.2          |
| ET               | DX-P3-ET        | 280.4 $\pm$ 7.3       | 0.36 $\pm$ 0.02 | 31.2 $\pm$ 7.9          |
|                  | DX-P2-GN5-ET    | 406.2 $\pm$ 21.7      | 0.39 $\pm$ 0.01 | 31.7 $\pm$ 5.7          |
|                  | DX-P3-GN5-ET    | 263.3 $\pm$ 26.6      | 0.38 $\pm$ 0.01 | 31.0 $\pm$ 6.6          |
|                  | DX-P2-GN1.8-ET  | 195.2 $\pm$ 6.5       | 0.35 $\pm$ 0.05 | 30.2 $\pm$ 7.1          |
|                  | DX-P3-GN1.8-ET  | 284.3 $\pm$ 18.3      | 0.36 $\pm$ 0.01 | 32.5 $\pm$ 7.6          |
|                  | Gal-P3-ET       | 280.6 $\pm$ 7.5       | 0.36 $\pm$ 0.02 | 40.8 $\pm$ 8.0          |
|                  | Gal-P2-GN5-ET   | 381.9 $\pm$ 43.9      | 0.45 $\pm$ 0.03 | 38.3 $\pm$ 6.2          |
|                  | Gal-P3-GN5-ET   | 276.5 $\pm$ 13.7      | 0.37 $\pm$ 0.04 | 35.5 $\pm$ 6.8          |
|                  | Gal-P2-GN1.8-ET | 219.7 $\pm$ 9.7       | 0.34 $\pm$ 0.09 | 36.8 $\pm$ 8.5          |
|                  | Gal-P3-GN1.8-ET | 274.1 $\pm$ 8.6       | 0.39 $\pm$ 0.04 | 32.7 $\pm$ 7.8          |
| ED               | DX-P3-ED        | 337.5 $\pm$ 15.3      | 0.33 $\pm$ 0.03 | 33.8 $\pm$ 7.7          |
|                  | DX-P2-GN5-ED    | 336.8 $\pm$ 69.7      | 0.40 $\pm$ 0.07 | 28.5 $\pm$ 7.9          |
|                  | DX-P3-GN5-ED    | 336.5 $\pm$ 7.9       | 0.31 $\pm$ 0.04 | 35.5 $\pm$ 9.3          |
|                  | DX-P2-GN1.8-ED  | 311.7 $\pm$ 22.2      | 0.44 $\pm$ 0.03 | 34.0 $\pm$ 7.6          |
|                  | DX-P3-GN1.8-ED  | 304.1 $\pm$ 21.6      | 0.33 $\pm$ 0.05 | 32.6 $\pm$ 8.4          |
|                  | Gal-P3-ED       | 300.3 $\pm$ 7.9       | 0.34 $\pm$ 0.02 | 32.7 $\pm$ 10.1         |
|                  | Gal-P2-GN5-ED   | 221.5 $\pm$ 21.5      | 0.37 $\pm$ 0.09 | 33.9 $\pm$ 9.5          |
|                  | Gal-P3-GN5-ED   | 240.9 $\pm$ 10.0      | 0.40 $\pm$ 0.06 | 35.4 $\pm$ 8.1          |
|                  | Gal-P2-GN1.8-ED | 301.1 $\pm$ 8.6       | 0.40 $\pm$ 0.05 | 34.9 $\pm$ 10.0         |
|                  | Gal-P3-GN1.8-ED | 278.9 $\pm$ 13.4      | 0.41 $\pm$ 0.05 | 36.5 $\pm$ 6.4          |

HT: HT-based vectors. HD: HD-based vectors. ET: ET-based vectors. ED: ED-based vectors. DX: dextran. Gal: galactomannan. P: protamine. GN5: gold nanoparticles of 5 nm diameter. GN1.8: gold nanoparticles of 1.8 nm diameter. PDI: polydispersity index. Data are expressed as mean  $\pm$  standard deviation;  $n=3$ .

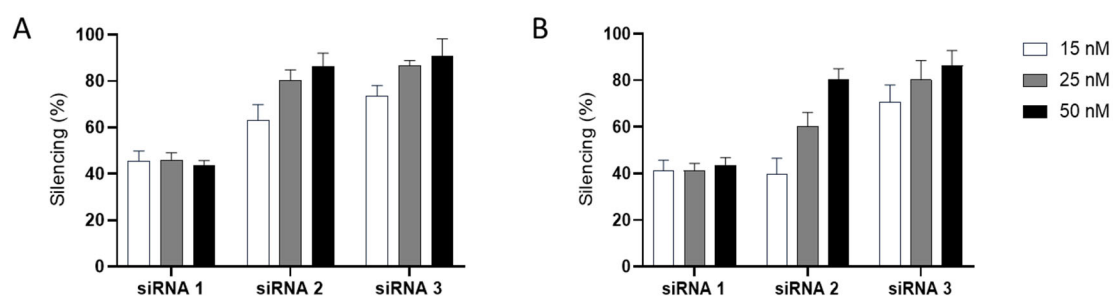

**Figure S2.** Study of the silencing capacity of different siRNA at 15, 25 and 50 nM. **(A)** Silencing effect of siRNAs 1, 2 and 3 formulated in Dx-P2-GN5-HT. **(B)** Silencing effect of siRNAs 1, 2 and 3 formulated with DharmaFECT®. Data are expressed as mean  $\pm$  standard deviation; n=3.

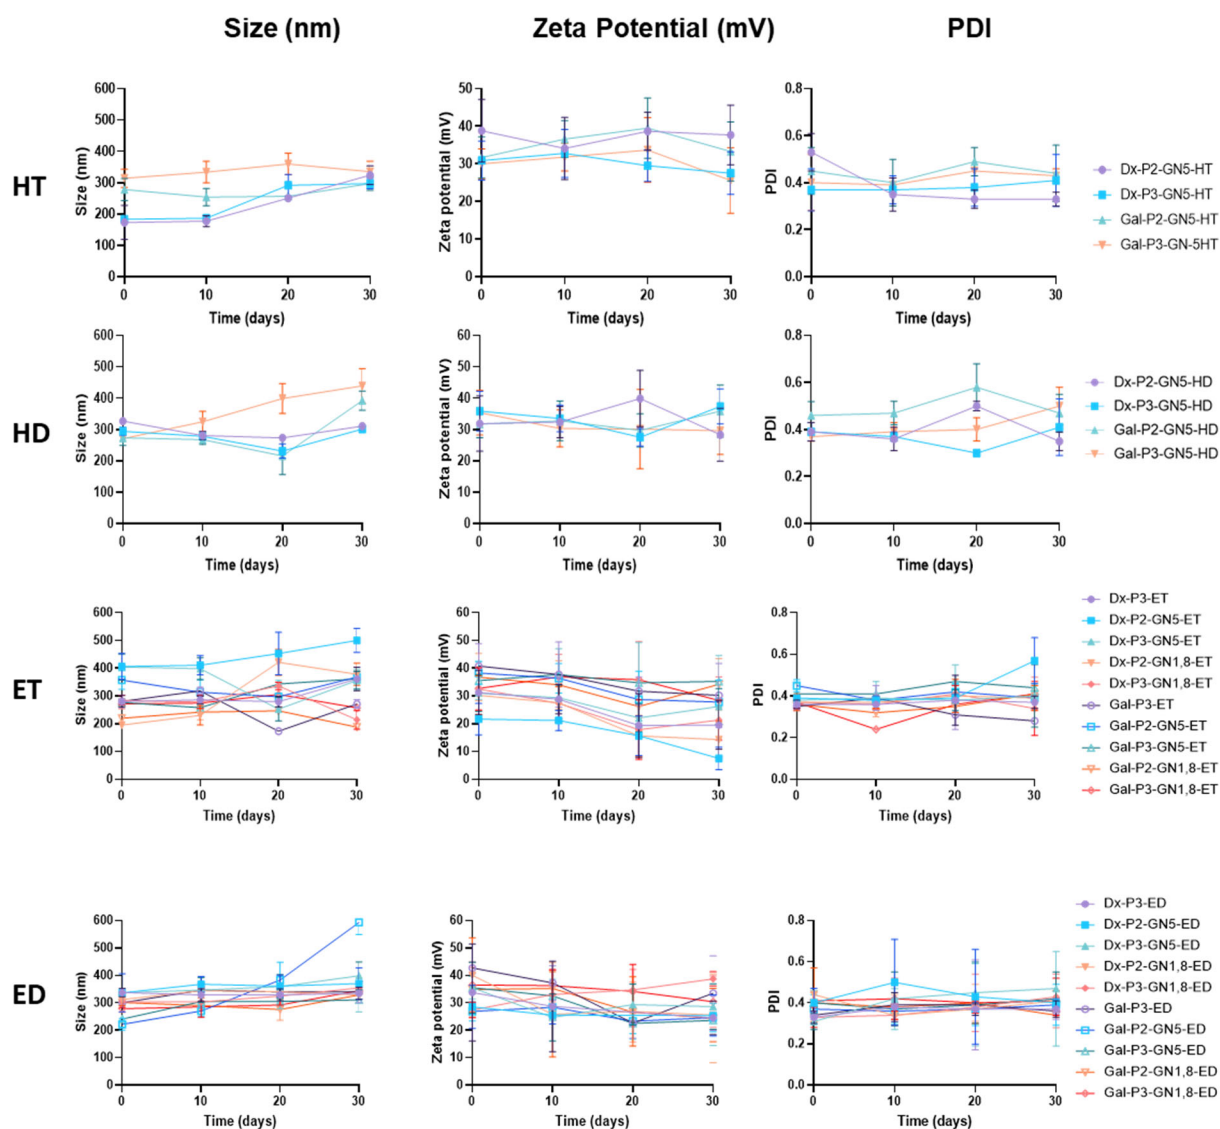

**Figure S3.** Size,  $\zeta$ -Potential and polydispersity index of siRNA-based vectors formulated with different SLNs at time zero, ten, twenty and thirty days. **(HT)** HT- Vectors. **(HD)** HD-Vectors. **(ET)** ET-Vectors. **(ED)** ED-Vectors. Data are expressed as mean  $\pm$  standard deviation; n=3.

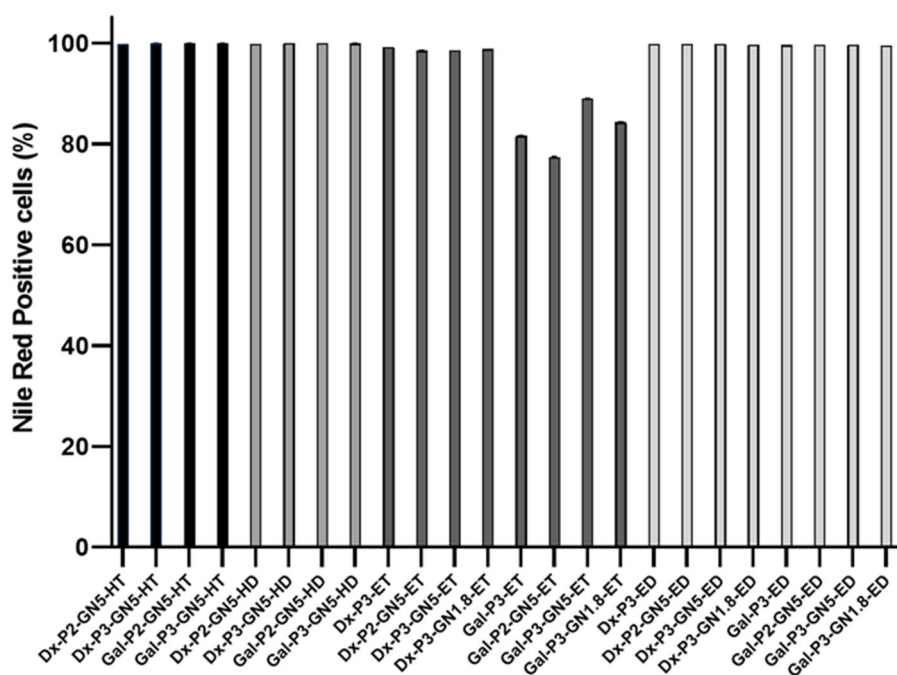

**Figure S4.** Cellular uptake of vectors using Nile-Red labelled SLNs in IMFE-1 cells 2 hours after transfection measured by flow cytometry. Data are expressed as mean  $\pm$  standard deviation; n=3.

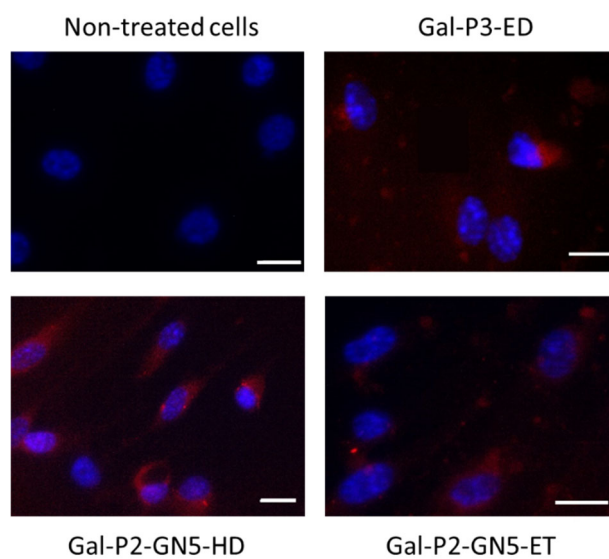

**Figure S5.** Cellular uptake of vectors using Nile-Red labelled SLNs in IMFE-1 cells 2 hours after transfection obtained by fluorescent microscopy. Scale bar = 15  $\mu$ m.

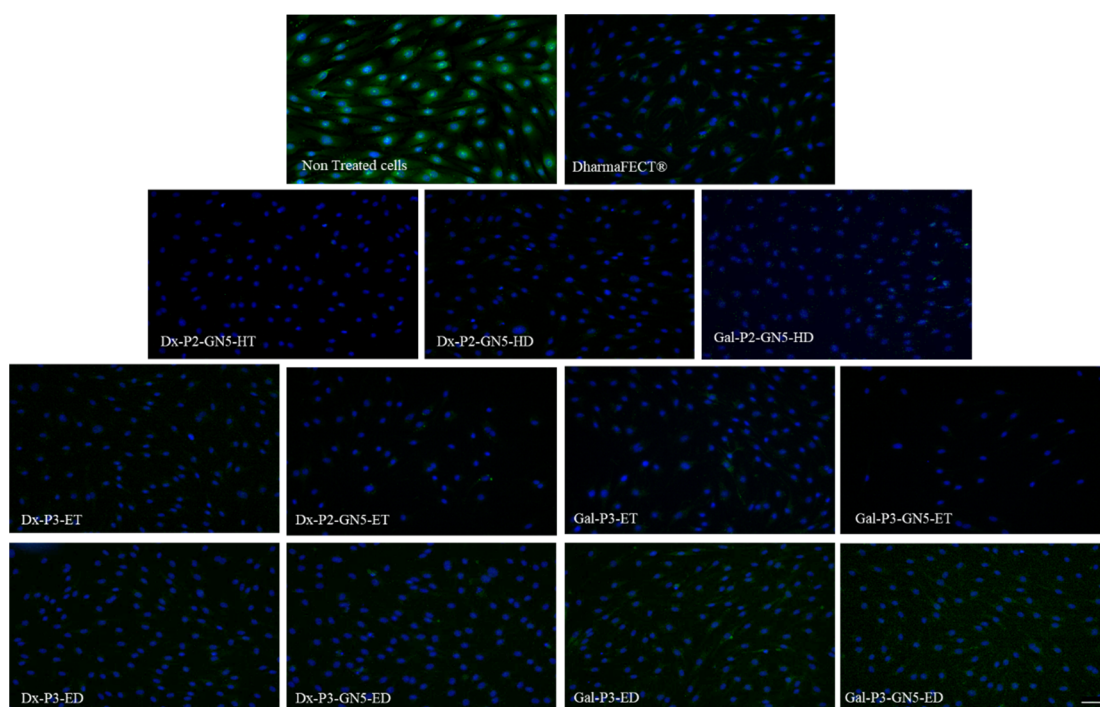

**Figure S6.** Immunocytochemistry study of Gb3S expression in IMFE-1 cells 7 days after treatment with different siRNA-based vectors. Scale bar: 100  $\mu$ m.

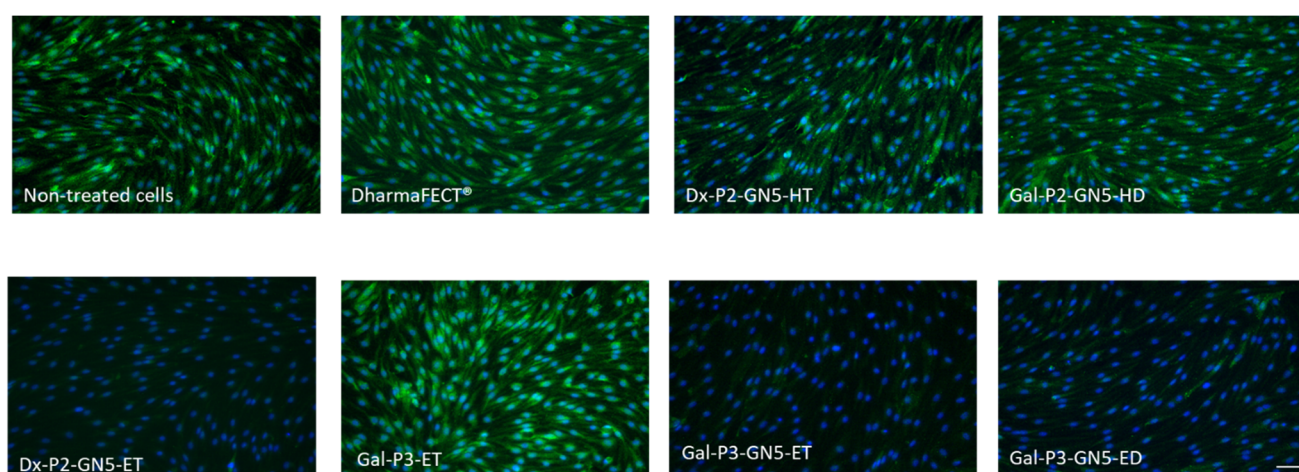

**Figure S7.** Immunocytochemistry study of Gb3S expression in IMFE-1 cells 15 days after treatment with different siRNA-based vectors. Scale bar: 100  $\mu$ m.

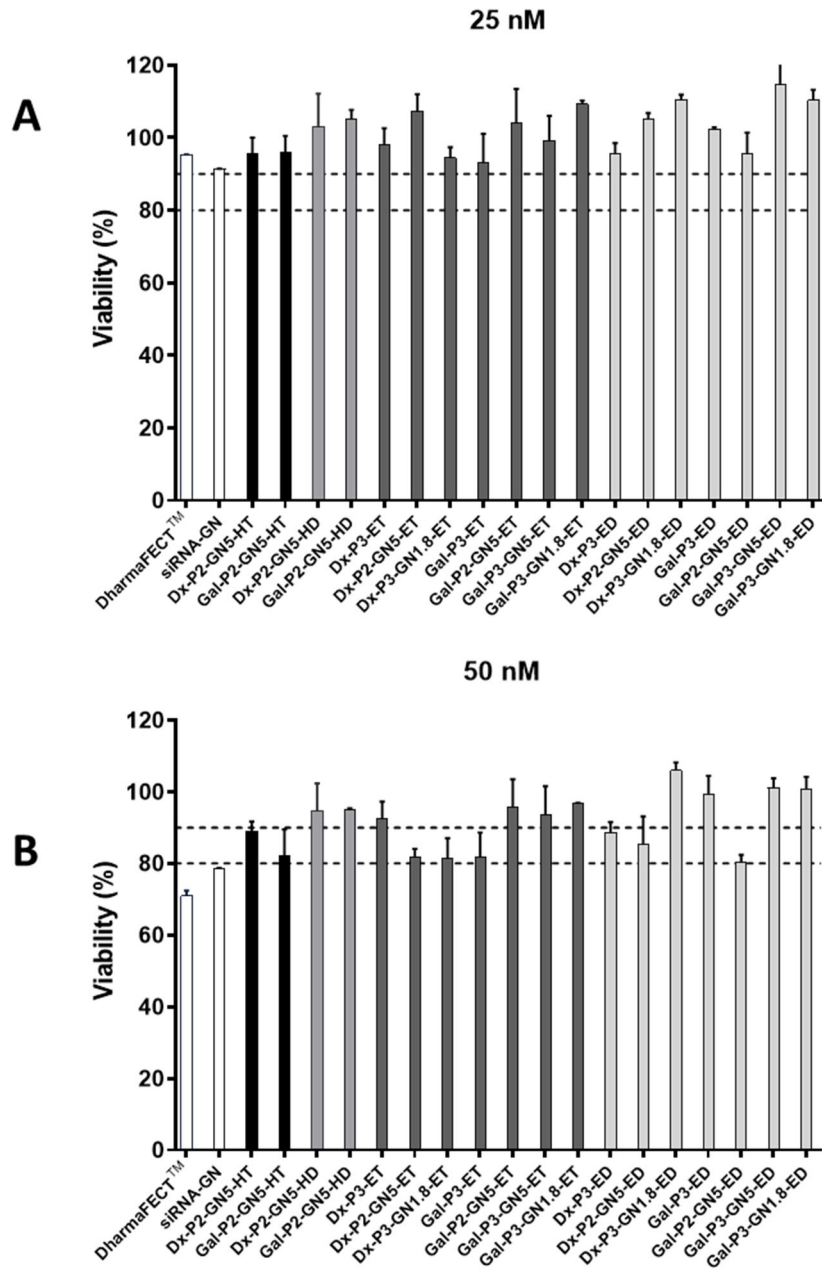

**Figure S8.** Viability in IMFE-1 cells two hours after the addition of siRNA-based vectors analyzed by MTT assay. Data are expressed as mean  $\pm$  standard deviation;  $n=3$ . **(A)** Viability in IMFE-1 after the addition of vectors a dose 25 nM. **(B)** Viability in IMFE-1 cells after the addition of vectors of vector at a dose 50 nM. Lines represent 80% and 90%.
